# Supplementary material for: Uncovering the Differential Molecular Basis of Adaptive Diversity in Three Echinochloa Leaf Transcriptomes
Source: PubMed Central journal article supplement (PMC4534374; doi:10.1371/journal.pone.0134419), 2015-08-12

(A) *E. oryzicola* (4X)

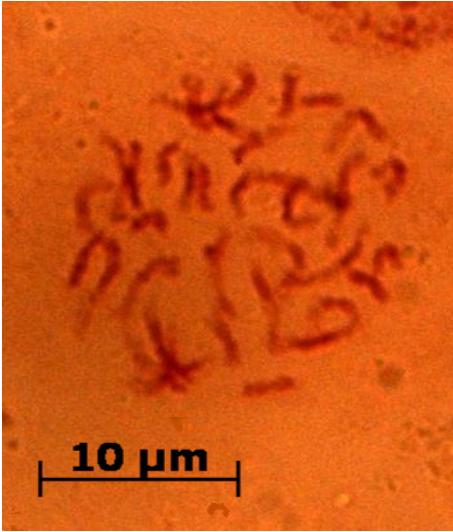

(B) EC-SNU1 (6X)

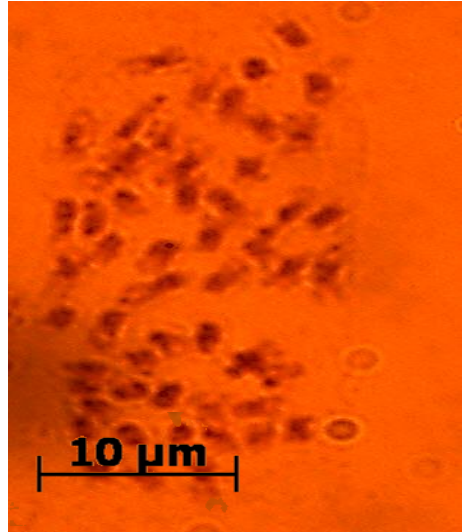

(C) EC-SNU2 (6X)

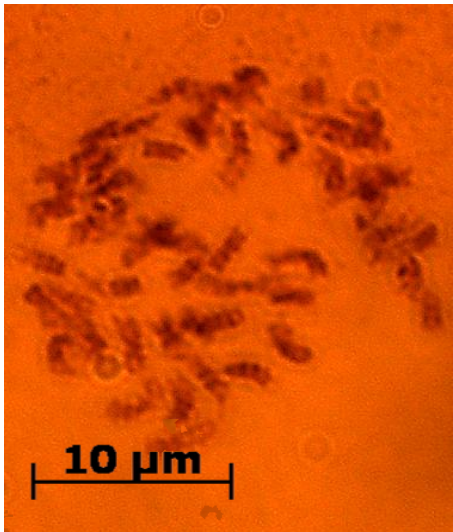

(D) EC-SNU3 (6X)

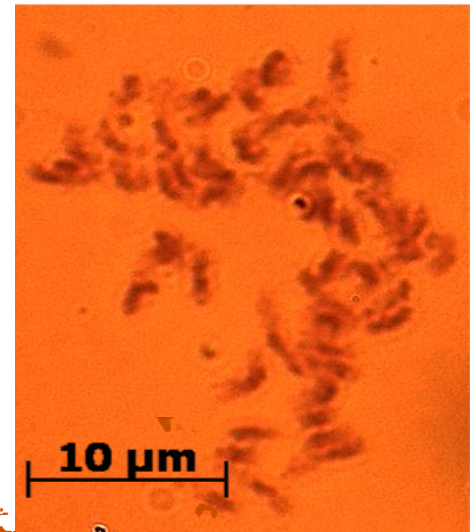

Supplement: pone.0134419.s003.pdf [file pone.0134419.s003.pdf]
