# Supplementary material for: Uncovering the Differential Molecular Basis of Adaptive Diversity in Three Echinochloa Leaf Transcriptomes
Source: PubMed Central journal article supplement (PMC4534374; doi:10.1371/journal.pone.0134419), 2015-08-12

**Biological Process**

response to stress  
biosynthetic process  
metabolic process  
cellular process  
biological process

**Cellular Process**

nucleus  
plasma membrane  
membrane  
plastid  
cellular component

**Molecular Process**

hydrolase activity  
DNA binding  
protein binding  
catalytic activity  
molecular function

EC-SNU1  
EC-SNU2  
EC-SNU3

0 2 4 6 8 10 12 14 16 18 20  
Relative ratio (%) in the transcriptome

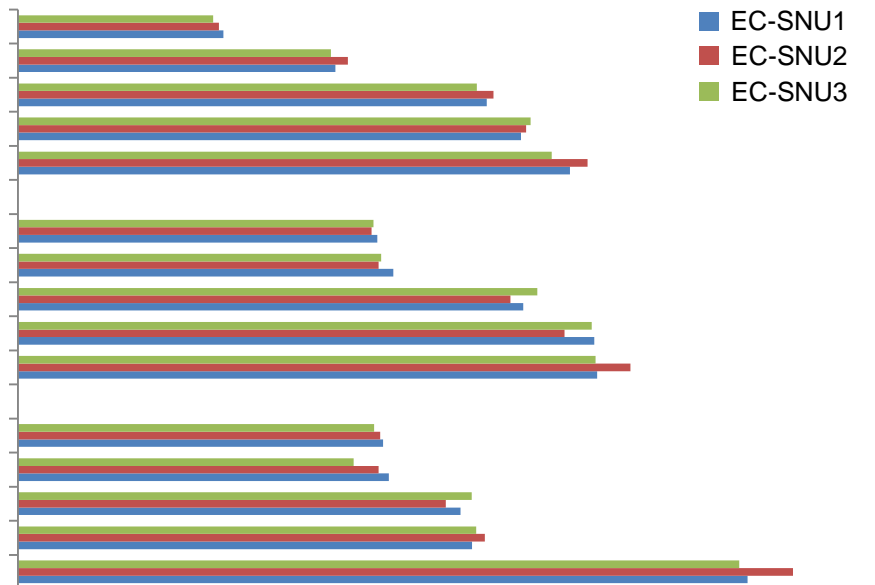

Supplement: pone.0134419.s005.pdf [file pone.0134419.s005.pdf]
