# Supplementary material for: Uncovering the Differential Molecular Basis of Adaptive Diversity in Three Echinochloa Leaf Transcriptomes
Source: PubMed Central journal article supplement (PMC4534374; doi:10.1371/journal.pone.0134419), 2015-08-12

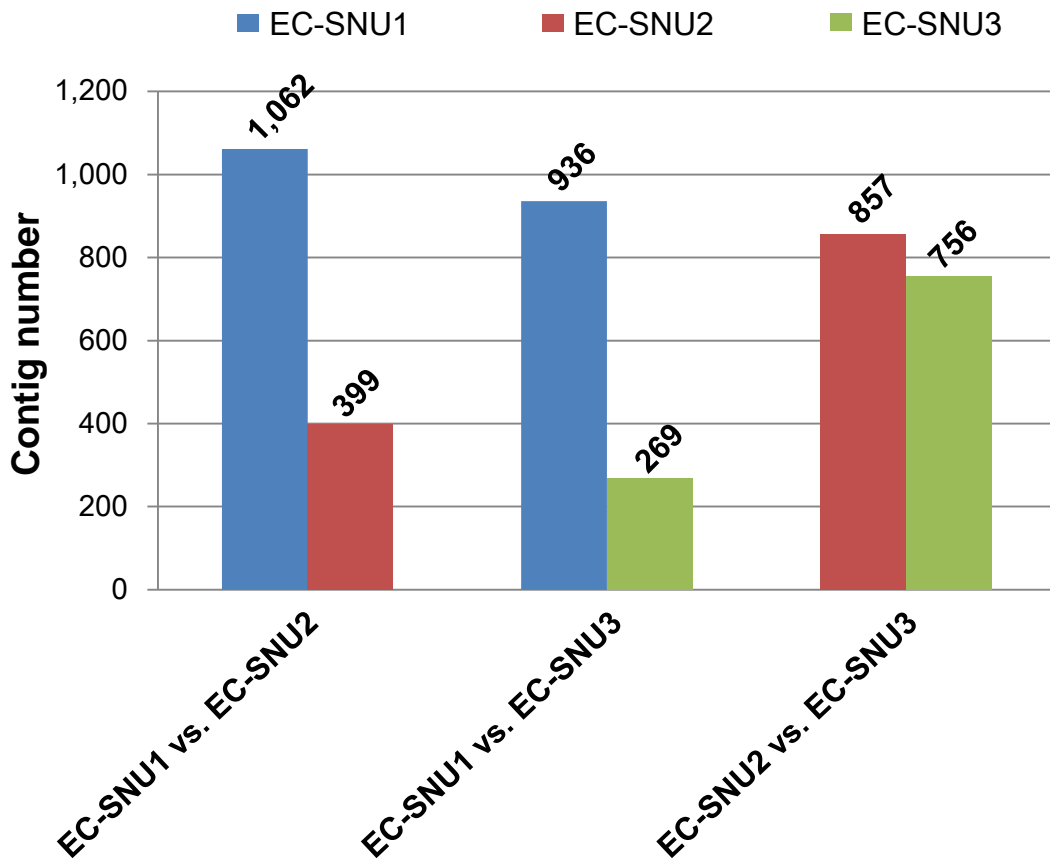

Supplement: pone.0134419.s007.pdf [file pone.0134419.s007.pdf]
